# Supplementary material for: Tunable 3D/2D MoS 2 /Ni 3 S 2 nanocomposites as an efficient electrocatalyst for the hydrogen evolution reaction
Source: Royal Society of Chemistry journal article supplement (doi:10.1039/d5tc03440j), 2026-01-01
Supplement: d5tc03440j1.pdf [file d5tc03440j1.pdf]

## Supporting Information

### **Tunable 3D/2D MoS<sub>2</sub>/Ni<sub>3</sub>S<sub>2</sub> nanocomposites as an Efficient Electrocatalyst for Hydrogen Evolution Reaction**

Van-Qui Le<sup>1</sup>, Phuoc-Anh Le<sup>1,3</sup>, Su-Yang Hsu<sup>2</sup>, Ya-Wen Hsu<sup>1</sup>, Chang-Yu Hsiao<sup>1</sup>, Yen-Lin Fu<sup>1</sup>, Shih-Yu Huang<sup>4</sup>, Jin-Ming Chen<sup>5</sup>, Kung-Hwa Wei<sup>1\*</sup>

<sup>1</sup> Department of Materials Science and Engineering, National Yang Ming Chiao Tung University, Hsinchu 30010, Taiwan

<sup>2</sup> National Synchrotron Radiation Research Center, Hsinchu, 30076, Taiwan

<sup>3</sup> Institute of Chemistry, Vietnam Academy of Science and Technology, Hanoi 100000, Vietnam

<sup>4</sup> Department of Physics, National Changhua University of Education, Changhua, 500, Taiwan

<sup>5</sup> Department of Electrophysics, National Yang Ming Chiao Tung University, Hsinchu 30010, Taiwan

\*Corresponding authors: Prof. Kung-Hwa Wei; khwei@nycu.edu.tw

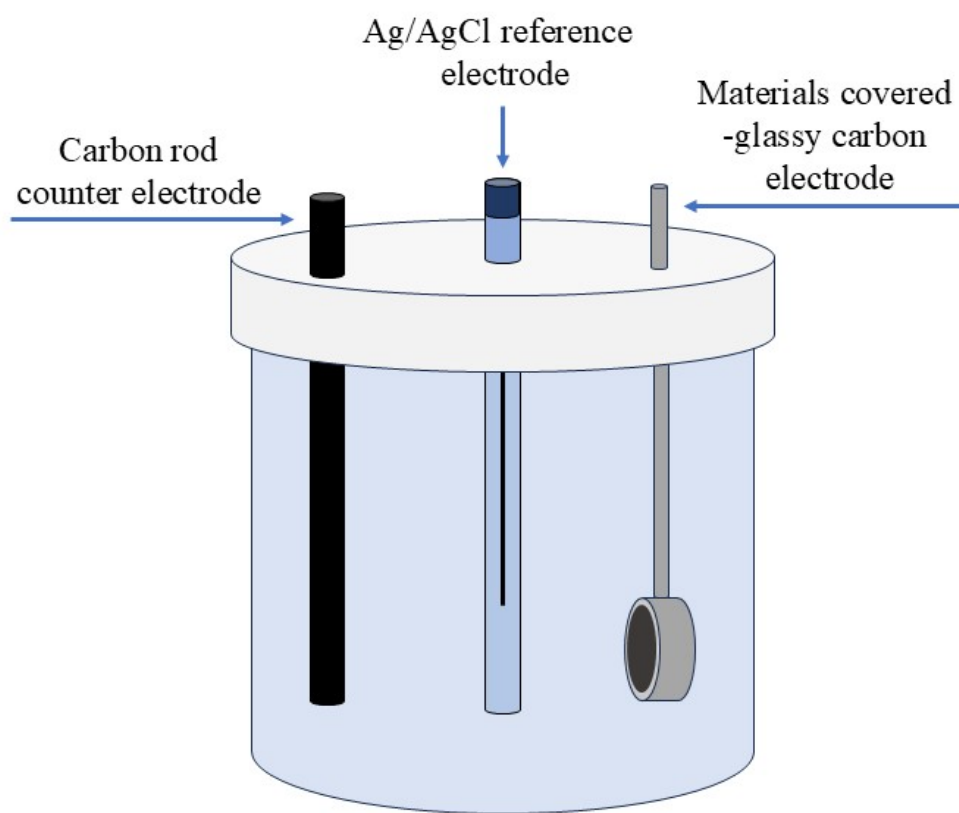

**Figure S1.** The three-electrode system in this research with carbon rod counter electrode, Ag/AgCl reference electrode, Ag/AgCl reference electrode, and materials covered-glassy carbon electrode.

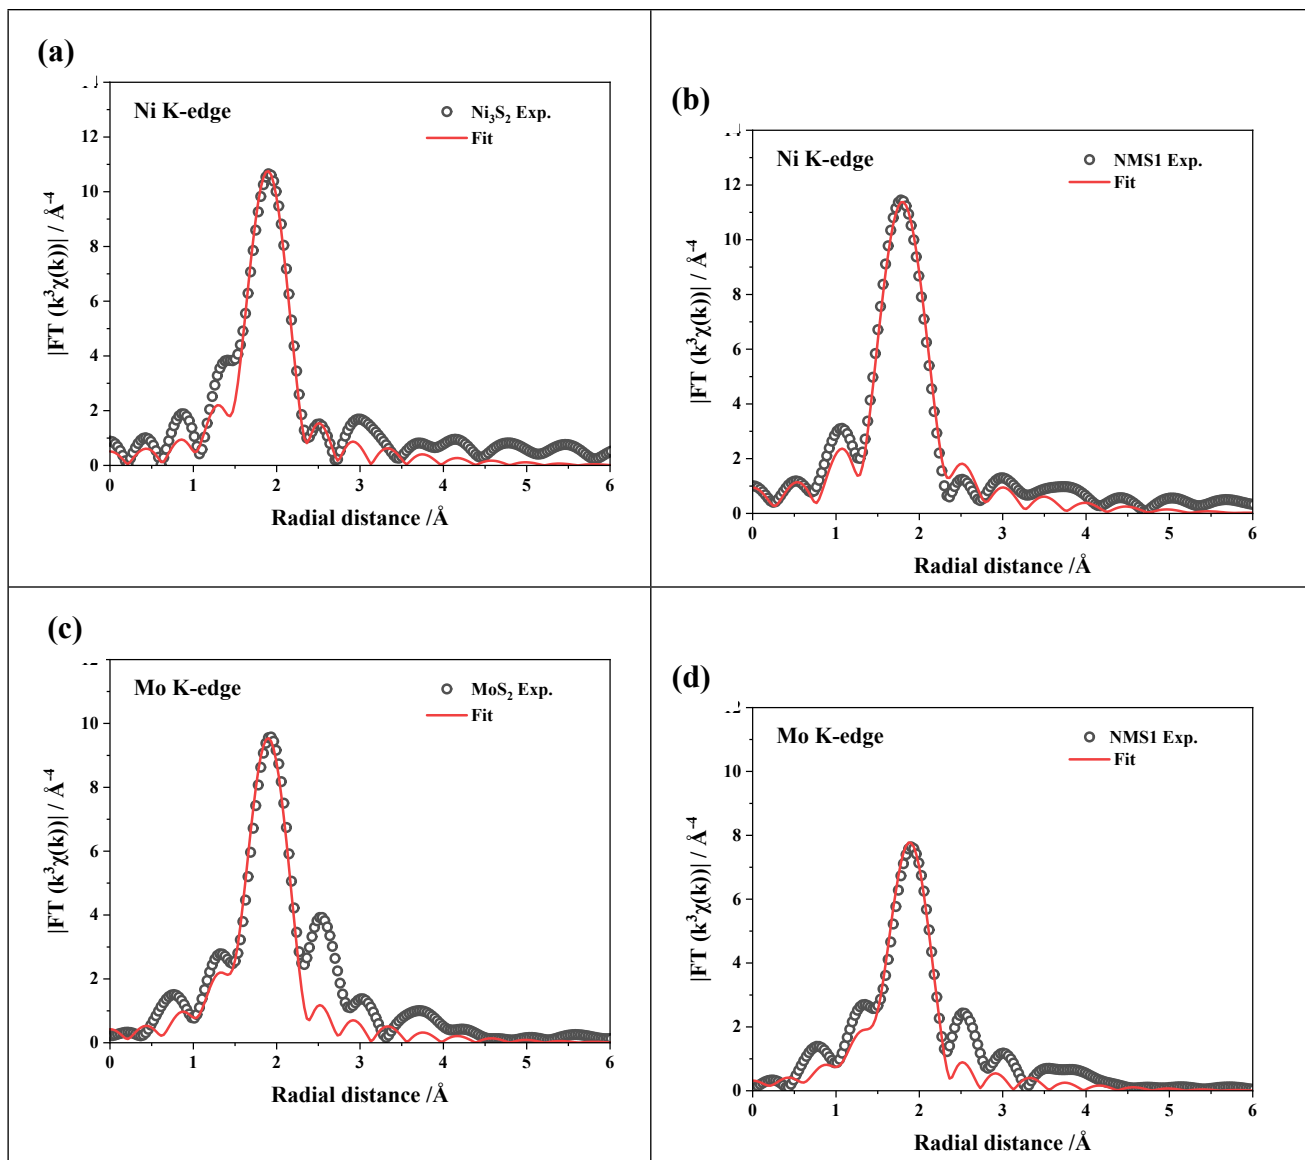

**Figure S2.** The FT  $k^3$ -weighted EXAFS fitting results of Ni K-edge (a)  $\text{Ni}_3\text{S}_2$  and (b) NMS1 and Mo K-edge (c)  $\text{MoS}_2$  and (d) NMS1.

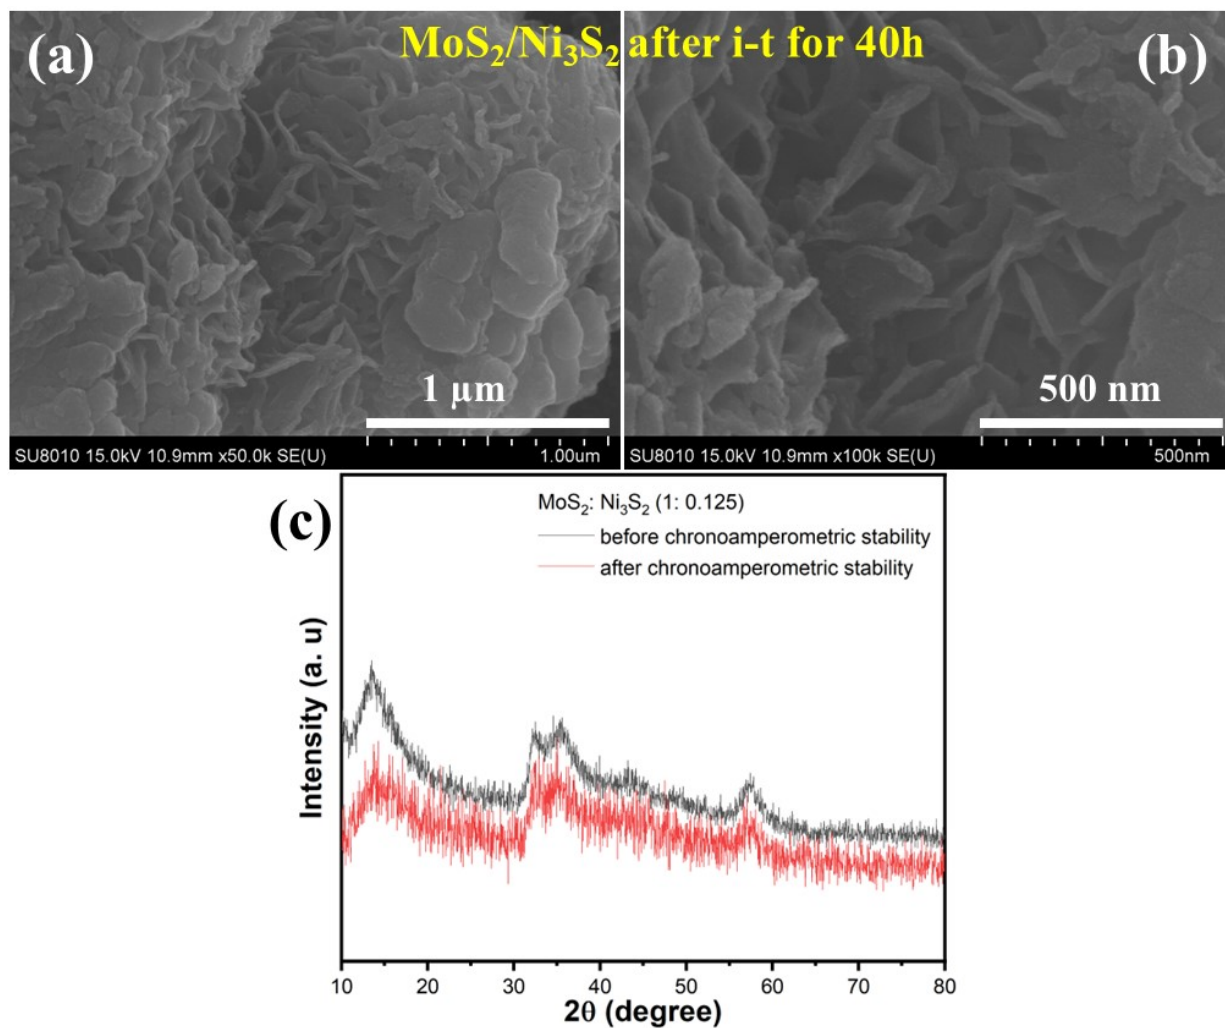

**Figure S3.** (a, b) The SEM images, and (c) XRD pattern of NMS1 samples after 40h chronoamperometric stability of i-t measurement.
